# Supplementary material for: A new millifluidic-based gastrointestinal platform to evaluate the effect of simulated dietary methylglyoxal intakes
Source: Royal Society of Chemistry journal article supplement (doi:10.1039/c9fo00332k), 2019-01-01
Supplement: c9fo00332k1.pdf [file c9fo00332k1.pdf]

**Table 1S.** Derivatisation yields ( $\% \pm \text{SD}$ ) of  $80\mu\text{M}$  MGO aqueous standard solution (calculated as peak area ratio between derivatised MGO and  $80\ \mu\text{M}$  2-methylquinoxaline standard)

| Temperature<br>( $^{\circ}\text{C}$ ) | Reaction time<br>(h) | Recovery<br>( $\% \pm \text{SD}$ ) |
|---------------------------------------|----------------------|------------------------------------|
| 4                                     | 1                    | $88.49 \pm 1.7$                    |
| 4                                     | 4                    | $90.45 \pm 3.8$                    |
| 4                                     | 8                    | $93.68 \pm 1.6$                    |
| 4                                     | 24                   | $95.12 \pm 4.1$                    |
| 20                                    | 1                    | $92.87 \pm 3.4$                    |
| 20                                    | 4                    | $91.26 \pm 2.4$                    |
| 20                                    | 8                    | $86.14 \pm 2.8$                    |
| 20                                    | 24                   | $74.91 \pm 1.6$                    |
| 37                                    | 1                    | $99.87 \pm 0.8$                    |
| 37                                    | 4                    | $93.34 \pm 1.0$                    |
| 37                                    | 8                    | $93.26 \pm 2.2$                    |
| 37                                    | 24                   | $75.19 \pm 2.1$                    |
